# Supplementary material for: Bayesian network analysis infers the importance of post-construction support in maintaining the functionality of pit latrines and septic systems across 12 countries
Source: Royal Society of Chemistry journal article supplement (doi:10.1039/d5ew00920k), 2026-01-01

## Supplementary Material

Bayesian belief network analysis infers the importance of post-construction support in maintaining the functionality of pit latrines and septic systems across 12 countries

### List of tables

Table S1. Variables used in the Bayesian Belief Network of sanitation system functionality and scientific justification for key O&M tasks.

Table S2. Factors influencing overflowing in 17,404 pit latrines across 12 Sub-Saharan African countries as identified through Bayesian Network analysis.

Table S3. Factors influencing evidence of overflowing in 1,130 septic systems across 12 Sub-Saharan African countries, as identified through Bayesian Network analysis.

Table S4. Scoring Rule Results for Model 1a.

Table S5. Logistic regression results for variables included in Model 1a.

Table S6. Scoring Rule Results for Model 1b.

Table S7. Logistic regression results for variables included in Model 1b.

Table S8. Scoring Rule Results for Model 1c.

Table S9. Logistic regression results for variables included in Model 1c.

Table S10. Scoring Rule Results for Model 2a.

Table S11. Logistic regression results for variables included in Model 2a.

Table S12. Scoring Rule Results for Model 2b.

Table S13. Logistic regression results for variables included in Model 2b.

Table S14. Scoring Rule Results for Model 2c.

Table S15. Logistic regression results for variables included in Model 2c.

Table S16. Scoring Rule Results for Model 3a.

Table S17. Logistic regression results for variables included in Model 3a (outcome = overflows).

Table S18. Logistic regression results for variables included in Model 3a (outcome = leakage).

Table S19. Scoring Rule Results for Model 3b.

Table S20. Logistic regression results for variables included in Model 3b (outcome = overflows).

Table S21. Logistic regression results for variables included in Model 3b (outcome = leakages).

Table S22. Scoring Rule Results for Model 3c.

Table S23. Logistic regression results for variables included in Model 3c (outcome = overflows).

Table S24. Logistic regression results for variables included in Model 3c (outcome = leakages).

Table S25. Scoring Rule Results for Model 4a.

Table S26. Logistic regression results for variables included in Model 4a.

Table S27. Scoring Rule Results for Model 4b.

Table 28. Logistic regression results for variables included in Model 4b.

Table S29. Scoring Rule Results for Model 4c.

Table S30. Logistic regression results for variables included in Model 4c.

## List of figures

- Fig S1. Output results for Model 1a: Outcome = rate of overflows; Sanitation type = pit latrines and septic systems
- Fig S2. Output results for Model 1b: Outcome = rate of overflows; Sanitation type = pit latrines
- Fig S3. Output results for Model 1c: Outcome = rate of overflows; Sanitation type = septic systems
- Fig S4. Output results for Model 2a: Outcome = rate of overflows; Sanitation type = pit latrines and septic systems
- Fig S5. Output results for Model 2b: Outcome = rate of overflows; Sanitation type = pit latrine
- Fig S6. Output results for Model 2c: Outcome = rate of overflows; Sanitation type = septic systems
- Fig S7. Output results for Model 3a: Outcome = combined rate of overflows and leakages; Sanitation type = pit latrines and septic systems
- Fig S8. Output results for Model 3b: Outcome = combined rate of overflows and leakages; Sanitation type = pit latrines
- Fig S9. Output results for Model 3c: Outcome = combined rate of overflows and leakages; Sanitation type = septic systems
- Fig S10. Output results for Model 4a: Outcome = leakages; Sanitation type = pit latrines and septic systems
- Fig S11. Output results for Model 4b: Outcome = leakages; Sanitation type = pit latrines
- Fig S12. Output results for Model 4c: Outcome = leakages; Sanitation type = septic systems
- Fig S13. Sample design for the household survey

**Table S1. Variables used in the Bayesian Belief Network of sanitation system functionality and scientific justification for key O&M tasks.**

| <b>Nodes<br/>(short name)<sup>a</sup></b> | <b>Description of variable</b>                                                                                                                                                                                      | <b>Output states</b>                 | <b>Rationale and Evidence</b>                                                                                                                                                                                                                                                                                               |
|-------------------------------------------|---------------------------------------------------------------------------------------------------------------------------------------------------------------------------------------------------------------------|--------------------------------------|-----------------------------------------------------------------------------------------------------------------------------------------------------------------------------------------------------------------------------------------------------------------------------------------------------------------------------|
| overflowing                               | Indicated by evidence of a sanitation facility being full and allowing waste to be discharged onto the ground at the time of the survey.                                                                            | no<br>yes                            | N/A                                                                                                                                                                                                                                                                                                                         |
| leaking                                   | Indicated by evidence of wastewater escaping from the sanitation facility through structural defects, such as cracks, gaps, or faulty seals, at the time of the survey, regardless of whether the system was full.  | no<br>yes                            | N/A                                                                                                                                                                                                                                                                                                                         |
| floodrisk                                 | Represents the likelihood of flooding based on the historical frequency of floods in the area.                                                                                                                      | low-risk<br>medium-risk<br>high-risk | Floodwater can damage the superstructures of pit latrines and septic systems, leading to overflows. Additionally, floods may hinder essential maintenance activities by causing delays in emptying, restricting access to supplies and spare parts, and potentially increasing maintenance costs (Hyde-Smith et al., 2022). |
| facilityfee                               | Indicates whether users pay a fee to use a facility.                                                                                                                                                                | no<br>yes                            | The operation and maintenance of many sanitation systems and fecal sludge treatment rely entirely on direct user fees, which can help cover infrequent costs such as spare parts, repairs, and desludging (World Health Organization, 2018a).                                                                               |
| cleaningperson                            | Indicates whether a person – formally employed or informally engaged - is responsible for cleaning the facility.                                                                                                    | no<br>yes                            | A dedicated caretaker ensures consistent cleaning and maintenance of sanitation facilities. This regular upkeep reduces the risk of costly repairs and extends the lifespan of the infrastructure, contributing to the system's long-term sustainability (Brikké, 2000)                                                     |
| repairperson                              | Indicates whether a skilled individual can repair the sanitation facility when needed.                                                                                                                              | no<br>yes                            | Ensuring that sufficient expertise is available within or near the community to undertake simple maintenance exercises can help keep facilities in good shape (Nelson et al., 2021).                                                                                                                                        |
| desludgingneeded                          | Indicates whether desludging is required for the sanitation facility. It is determined by observing the facility's current condition, indicating if the waste has accumulated to a level that necessitates removal. | no<br>yes                            | Emptying minimizes the risk that the fecal sludge and/or effluent overflows into the toilet and/or into water bodies or onto open ground (Conaway et al., 2023), and overfilled pits can collapse due to the weight of accumulated waste (Nakagiri et al., 2015)                                                            |
| emptiedonce                               | Indicates whether the sanitation facility has been emptied at once in the past                                                                                                                                      | no<br>yes                            | Inadequate emptying can lead to the restricted use of sanitation systems. When pits or tanks are not emptied regularly, they may become clogged or overloaded, reducing                                                                                                                                                     |

|                  |                                                                                                                                                 |                                                          |                                                                                                                                                                                                                                                                                                                                                                                          |
|------------------|-------------------------------------------------------------------------------------------------------------------------------------------------|----------------------------------------------------------|------------------------------------------------------------------------------------------------------------------------------------------------------------------------------------------------------------------------------------------------------------------------------------------------------------------------------------------------------------------------------------------|
|                  |                                                                                                                                                 |                                                          | their ability to process waste effectively (Cookey et al., 2020; Thye et al., 2011)                                                                                                                                                                                                                                                                                                      |
| structuraldamage | Indicates whether repairs are needed on the superstructure as indicated by evidence of cracking or damage to the toilet pedestal or squat slab. | no<br>yes                                                | Repairs to the superstructure ensure sanitation facility stability, usability, and hygiene by addressing cracks, damage, and structural weaknesses that could lead to service disruptions (Lüthi et al., 2011).                                                                                                                                                                          |
| floorcondition   | Assesses the condition of the floor or slab based on visible damage, wear, and tear.                                                            | severely damaged<br>moderately damaged<br>good condition | Maintain structural integrity and prevent further deterioration, as well as create a seamless surface that is much easier to clean and maintain (Brikké, 2000).                                                                                                                                                                                                                          |
| visibleexcreta   | Indicates whether urine or feces are visible on the floor of the sanitation facility.                                                           | no<br>yes                                                | A facility with visible waste may indicate inadequate cleaning, poor drainage, or structural issues, which can lead to service disruptions and decreased usability. (Jenkins & Scott, 2007). Individuals may prefer open defecation, mainly when sanitation options are unappealing or unhygienically maintained (Dreibelbis et al., 2015).                                              |
| cleansesmaterial | Assesses whether sanitation users use appropriate cleansing materials, such as toilet paper or water, at the facility.                          | not available<br>available                               | The use of non-degradable cleansing materials, such as magazines, plastic bags, or stones, could clog the system, reduce the effective volume of the system, lead to rapid latrine filling, cause problems with emptying, and reduced treatment efficiency (Brikké & Bredero, 2003; Graham & Polizzotto, 2013; McMahon et al., 2011).                                                    |
| sharingfacility  | Indicates whether a household uses their sanitation facility with multiple other households or members of the public.                           | no<br>yes                                                | Shared sanitation facilities frequently accommodate numerous users, raising the likelihood of blockages or backups. They are also more susceptible to physical issues like cracked pipes, broken sewer lines, and leaky joints due to regular wear and tear. Furthermore, the absence of accountability often results in neglected maintenance (Antwi-Agyei et al., 2020; Simiyu, 2016). |
| watersupply      | Indicates whether there is continuous water supply throughout the year                                                                          | continuous<br>non-continuous                             | Access to adequate water supplies is essential for the operation, maintenance, and cleaning of sanitation systems and personal and domestic hygiene. In some cultures, water is also crucial for flushing, sewerage, and cleansing after defecation (Tilley et al., 2014).                                                                                                               |

<sup>a</sup> Short names as used in the Bayesian network analysis program.

**Table S2. Factors influencing overflowing in 17,404 pit latrines across 12 Sub-Saharan African countries as identified through Bayesian Network analysis.**

| <b>Node</b>           | <b>Mutual info</b> | <b>Percent</b> | <b>Variance of beliefs</b> |
|-----------------------|--------------------|----------------|----------------------------|
| Overflowing           | 0.87909            | 100            | 0.2092790                  |
| Desludging needed     | 0.15721            | 17.9           | 0.0457274                  |
| Emptied frequently    | 0.00948            | 1.08           | 0.0030599                  |
| Structural damage     | 0.00313            | 0.356          | 0.0009236                  |
| Emptied at least once | 0.00116            | 0.132          | 0.0003198                  |
| Flood risk            | 0.00057            | 0.0651         | 0.0001648                  |
| Visible excreta       | 0.00034            | 0.0385         | 0.0000984                  |
| Repair person         | 0.00004            | 0.00473        | 0.0000121                  |
| Flies present         | 0.00001            | 0.00167        | 0.0000043                  |
| Shared facility       | 0.00001            | 0.000698       | 0.0000018                  |
| Cleaning person       | 0.00000            | 0.000283       | 0.0000007                  |
| Cleansing material    | 0.00000            | 0.000153       | 0.0000004                  |
| Floor condition       | 0.00000            | 0.000122       | 0.0000003                  |
| Facility fee          | 0.00000            | 5.38e-05       | 0.0000001                  |
| Water supply          | 0.00000            | 0.000000       | 0.0000000                  |

**Table S3. Factors influencing evidence of overflowing in 1,130 septic systems across 12 Sub-Saharan African countries, as identified through Bayesian Network analysis.**

| <b>Node</b>           | <b>Mutual info</b> | <b>Percent</b> | <b>Variance of beliefs</b> |
|-----------------------|--------------------|----------------|----------------------------|
| Overflowing           | 0.65313            | 100            | 0.1397826                  |
| Desludging needed     | 0.09856            | 15.1           | 0.0274483                  |
| Flood risk            | 0.01060            | 1.62           | 0.0017110                  |
| Structural damage     | 0.00248            | 0.379          | 0.0004584                  |
| Emptied frequently    | 0.00215            | 0.329          | 0.0005630                  |
| Emptied at least once | 0.00110            | 0.169          | 0.0002893                  |
| Visible excreta       | 0.00069            | 0.106          | 0.0001329                  |
| Facility fee          | 0.00011            | 0.0169         | 0.0000230                  |
| Flies present         | 0.00004            | 0.00605        | 0.0000076                  |
| Shared facility       | 0.00003            | 0.00482        | 0.0000061                  |
| Water supply          | 0.00001            | 0.00196        | 0.0000025                  |
| Cleansing material    | 0.00001            | 0.00103        | 0.0000013                  |
| Repair person         | 0.00000            | 0.000142       | 0.0000002                  |
| Cleaning person       | 0.00000            | 2.63e-05       | 0.0000000                  |
| Floor condition       | 0.00000            | 0.0000000      | 0.0000000                  |

**Fig S1. Output results for Model 1a: Outcome = rate of overflows; Sanitation type = pit latrines and septic systems.**

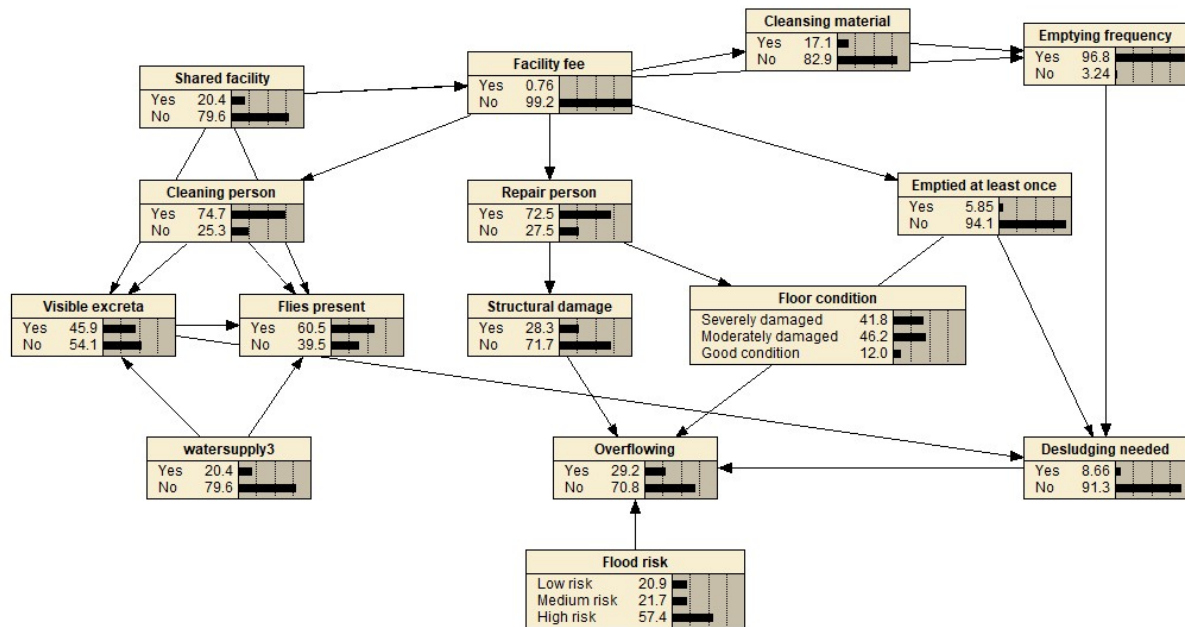

**Table S4. Scoring Rule Results for Model 1a.**

|                  |        |
|------------------|--------|
| Logarithmic loss | 0.4807 |
| Quadratic loss   | 0.3109 |
| Spherical payoff | 0.8285 |
| Gini coeff       | 0.3248 |
| Area under ROC   | 0.6624 |

**Table S5. Logistic regression results for variables included in Model 1a.**

| overflowing3      | Odds ratio | Std. err. | z     | P>z   | [95% conf. interval] |
|-------------------|------------|-----------|-------|-------|----------------------|
| visibleexcreta3   | .978297    | .0841813  | -0.25 | 0.799 | .8264675 1.158019    |
| fliespresent3     | 1.35697    | .1239038  | 3.34  | 0.001 | 1.134613 1.622903    |
| floorcondition3   | 1.253678   | .0927101  | 3.06  | 0.002 | 1.084524 1.449215    |
| structuraldamage3 | 1.176526   | .1227732  | 1.56  | 0.119 | .9589071 .443531     |
| desludgingneeded3 | 1          | (omitted) |       |       |                      |
| emptiedonce3      | .6127957   | .2040023  | -1.47 | 0.141 | .3191149 1.17675     |
| cleansmaterial3   | 1.085078   | .1200951  | 0.74  | 0.461 | .8734758 1.347941    |
| repairperson3     | .8330187   | .0899345  | -1.69 | 0.091 | .6741511 .029325     |
| cleaningperson3   | .9238839   | .1034707  | -0.71 | 0.480 | .7417999 1.150663    |
| facilityfee3      | .4213924   | .2605576  | -1.40 | 0.162 | .1254201 1.415814    |
| sharingfacility3  | .9728193   | .1028486  | -0.26 | 0.794 | .7907538 1.196804    |
| watersupply3      | 1.129232   | .1163115  | 1.18  | 0.238 | .9228034 1.381839    |
| emptfreq3         | 2.432792   | 1.307306  | 1.65  | 0.098 | .8485867 6.974513    |
| floodrisk         | 1.098605   | .0591491  | 1.75  | 0.081 | .9885819 1.220873    |
| _cons             | .0818331   | .0454931  | -4.50 | 0.000 | .0275248 .2432951    |

**Fig S2. Output results for Model 1b: Outcome = rate of overflows; Sanitation type = pit latrines.**

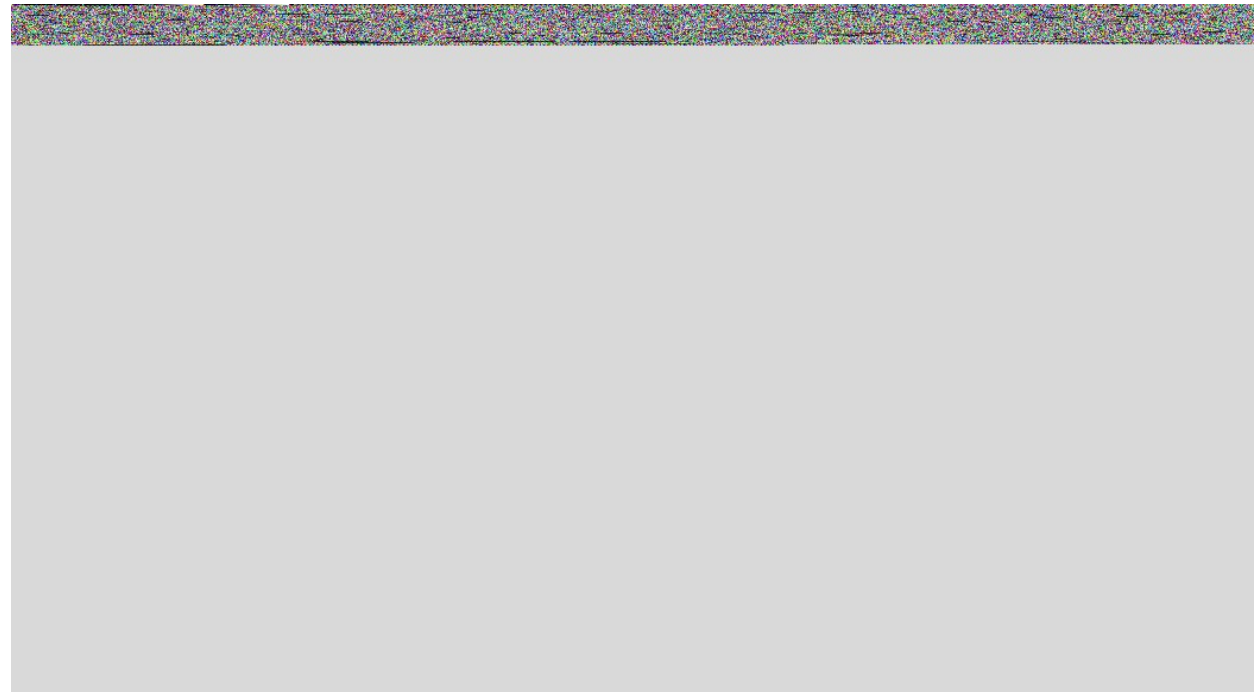

**Table S6. Scoring Rule Results for Model 1b.**

|                  |        |
|------------------|--------|
| Logarithmic loss | 0.4884 |
| Quadratic loss   | 0.3180 |
| Spherical payoff | 0.8240 |
| Gini coeff       | 0.3372 |
| Area under ROC   | 0.6686 |

**Table S7. Logistic regression results for variables included in Model 1b.**

| overflowing3      | Odds ratio | Std. err. | z      | P>z   | [95% conf. interval] |          |
|-------------------|------------|-----------|--------|-------|----------------------|----------|
| visibleexcreta3   | 1.143116   | .0445475  | 3.43   | 0.001 | 1.059055             | 1.233848 |
| fliespresent3     | 1.347792   | .0553108  | 7.27   | 0.000 | 1.243630             | 1.460678 |
| floorcondition3   | 1.232766   | .040337   | 6.40   | 0.000 | 1.156189             | 1.314416 |
| structuraldamage3 | 1.170411   | .0547461  | 3.36   | 0.001 | 1.067883             | 1.282784 |
| desludgingneeded3 | 1          | (omitted) |        |       |                      |          |
| emptiedonce3      | .6867384   | .0914618  | -2.82  | 0.005 | .5289637             | .8915729 |
| cleansmaterial3   | 1.004017   | .0528587  | 0.08   | 0.939 | .9055819             | 1.113152 |
| repairperson3     | 1.000978   | .0489211  | 0.02   | 0.984 | .9095437             | 1.101604 |
| cleaningperson3   | .7324072   | .0374562  | -6.09  | 0.000 | .6625538             | .8096254 |
| facilityfee3      | .5511781   | .1473073  | -2.23  | 0.026 | .3264381             | .9306432 |
| sharingfacility3  | 1.203683   | .0564382  | 3.95   | 0.000 | 1.097996             | 1.319541 |
| watersupply3      | 1.196066   | .0550211  | 3.89   | 0.000 | 1.092945             | 1.308916 |
| emptfreq3         | 2.287205   | .4776572  | 3.96   | 0.000 | 1.518942             | 3.444046 |
| floodrisk         | 1.080804   | .0260969  | 3.22   | 0.001 | 1.030846             | 1.133183 |
| _cons             | .0906427   | .0199086  | -10.93 | 0.000 | .0589354             | .139408  |

**Fig S3. Output results for Model 1c: Outcome = rate of overflows; Sanitation type = septic systems.**

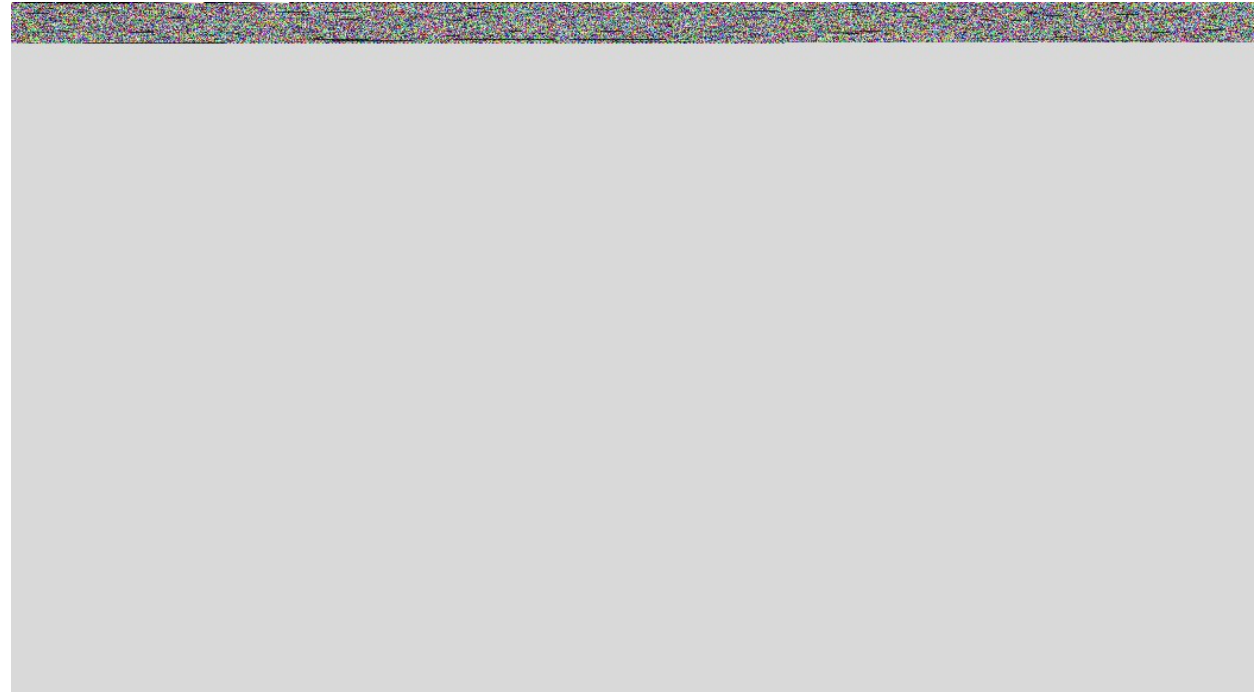

**Table S8. Scoring Rule Results for Model 1c.**

|                  |        |
|------------------|--------|
| Logarithmic loss | 0.3748 |
| Quadratic loss   | 0.2267 |
| Spherical payoff | 0.8778 |
| Gini coeff       | 0.4447 |
| Area under ROC   | 0.7224 |

**Table S9. Logistic regression results for variables included in Model 1c.**

| overflowing3      | Odds ratio | Std. err. | z     | P>z   | [95% conf. interval] |          |
|-------------------|------------|-----------|-------|-------|----------------------|----------|
| visibleexcreta3   | 1.415712   | .5415864  | 0.91  | 0.364 | .668874              | 2.99644  |
| fliespresent3     | 1.575058   | .6739984  | 1.06  | 0.288 | .6808491             | 3.643699 |
| floorcondition3   | 2.546186   | .8758004  | 2.72  | 0.007 | 1.297496             | 4.996596 |
| structuraldamage3 | .3831796   | .1964728  | -1.87 | 0.061 | .1402666             | 1.046768 |
| desludgingneeded3 | 1          | (omitted) |       |       |                      |          |
| emptiedonce3      | 1          | (omitted) |       |       |                      |          |
| cleansematerial3  | 4.179092   | 1.496209  | 3.99  | 0.000 | 2.071728             | 8.430072 |
| repairperson3     | 1.050551   | .5379795  | 0.10  | 0.923 | .3850555             | 2.866231 |
| cleaningperson3   | .9111961   | .3854782  | -0.22 | 0.826 | .397662              | 2.0879   |
| facilityfee3      | 1          | (omitted) |       |       |                      |          |
| sharingfacility3  | .5774304   | .2477484  | -1.28 | 0.201 | .2490513             | 1.338784 |
| watersupply3      | 1.788926   | .8811268  | 1.18  | 0.238 | .6812982             | 4.697292 |
| emptfreq3         | 1          | (omitted) |       |       |                      |          |
| floodrisk         | 2.426986   | .8309772  | 2.59  | 0.010 | 1.240577             | 4.748    |
| _cons             | .008504    | .0075937  | -5.34 | 0.000 | .0014775             | .0489452 |



**Fig S4. Output results for Model 2a: Outcome = rate of overflows; Sanitation type = pit latrines and septic systems.**

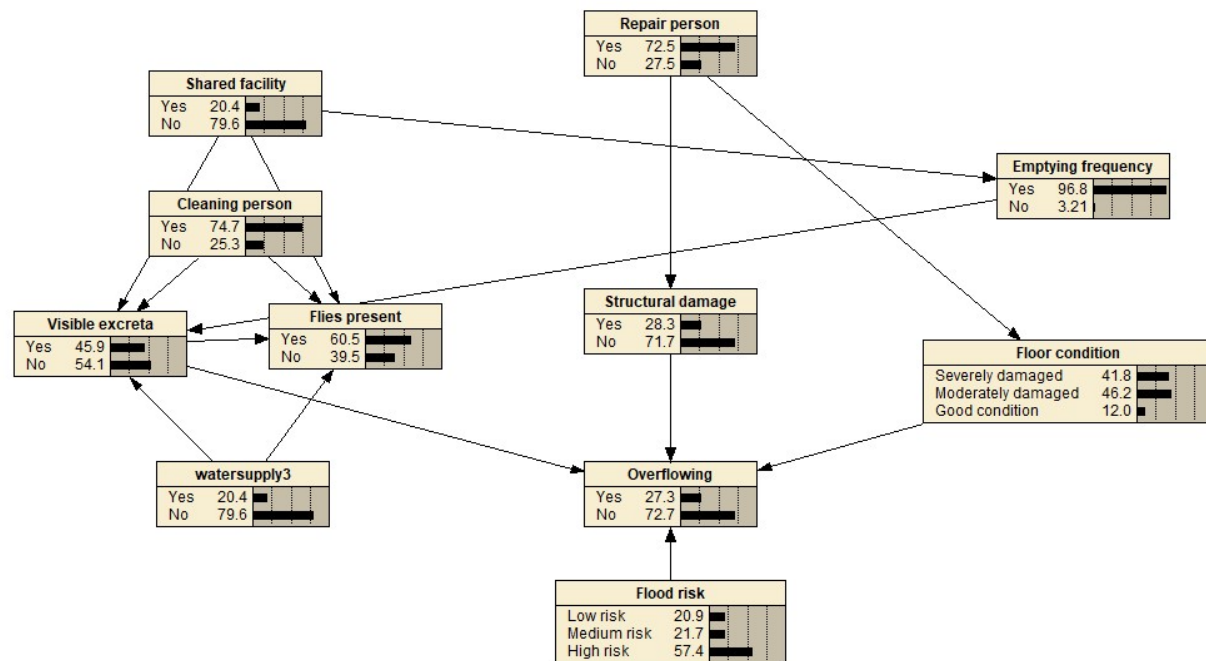

**Table S10. Scoring Rule Results for Model 2a.**

|                  |        |
|------------------|--------|
| Logarithmic loss | 0.5671 |
| Quadratic loss   | 0.3811 |
| Spherical payoff | 0.7856 |
| Gini coeff       | 0.2579 |
| Area under ROC   | 0.6289 |

**Table S11. Logistic regression results for variables included in Model 2a.**

| overflowing3      | Odds ratio | Std. err. | z     | P>z   | [95% conf. interval] |
|-------------------|------------|-----------|-------|-------|----------------------|
| visibleexcreta3   | 1.040961   | .0813339  | 0.51  | 0.607 | .8931551 1.213226    |
| fliespresent3     | 1.337829   | .1109207  | 3.51  | 0.000 | 1.137173 1.57389     |
| floorcondition3   | 1.401595   | .0930124  | 5.09  | 0.000 | 1.230652 1.596283    |
| structuraldamage3 | 1.671065   | .1515854  | 5.66  | 0.000 | 1.398876 1.996215    |
| repairperson3     | .8315463   | .0813717  | -1.89 | 0.059 | .6864223 1.007353    |
| cleaningperson3   | .7910916   | .0789523  | -2.35 | 0.019 | .6505421 .9620067    |
| sharingfacility3  | .9840871   | .0926037  | -0.17 | 0.865 | .8183415 1.183403    |
| watersupply3      | 1.075824   | .1014013  | 0.78  | 0.438 | .8943580 1.294109    |
| emptfreq3         | 1.927976   | .5305106  | 2.39  | 0.017 | 1.124298 3.306147    |
| floodrisk         | 1.006762   | .0485239  | 0.14  | 0.889 | .9160113 1.106504    |
| _cons             | .1375702   | .0419852  | -6.50 | 0.000 | .0756389 .2502093    |

**Fig S5. Output results for Model 2b: Outcome = rate of overflows; Sanitation type = pit latrines.**

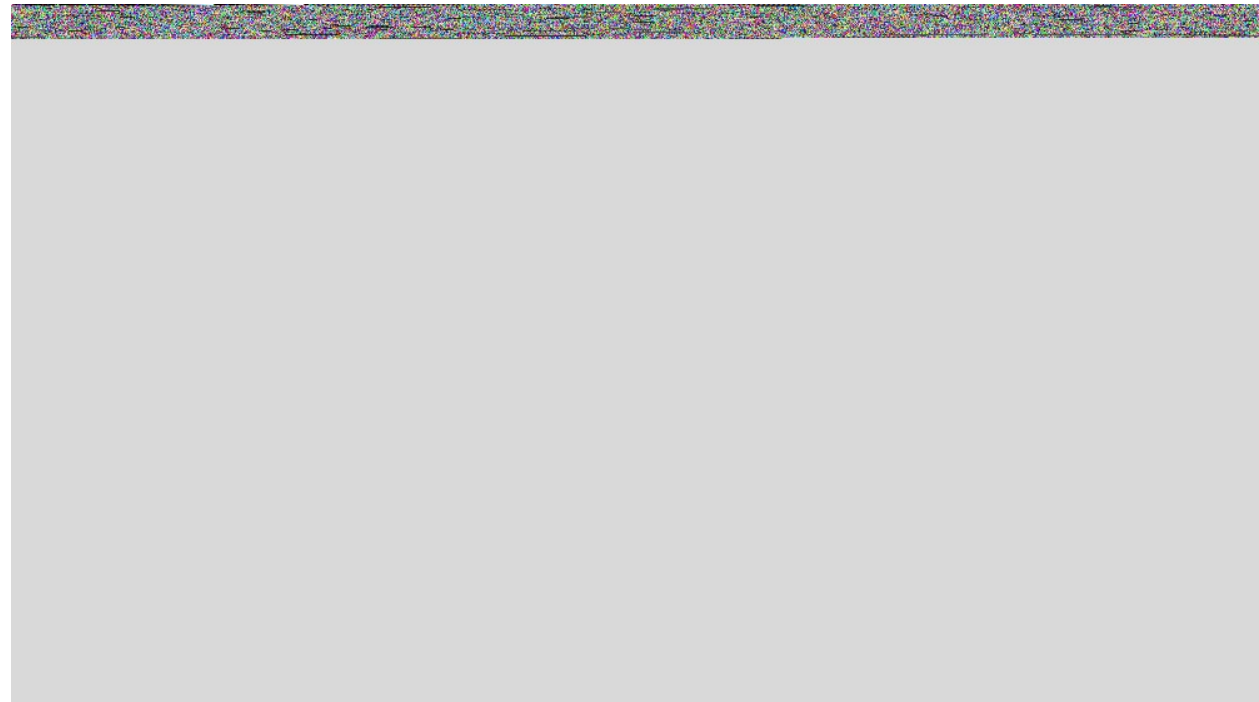

**Table S12. Scoring Rule Results for Model 2b.**

|                  |        |
|------------------|--------|
| Logarithmic loss | 0.5685 |
| Quadratic loss   | 0.3821 |
| Spherical payoff | 0.7850 |
| Gini coeff       | 0.2260 |
| Area under ROC   | 0.6130 |

**Table S13. Logistic regression results for variables included in Model 2b.**

| overflowing3      | Odds ratio | Std. err. | z      | P>z   | [95% conf. interval] |
|-------------------|------------|-----------|--------|-------|----------------------|
| visibleexcreta3   | 1.156722   | .0409638  | 4.11   | 0.000 | 1.079157 1.239861    |
| fliespresent3     | 1.4104     | .0529882  | 9.15   | 0.000 | 1.310276 1.518174    |
| floorcondition3   | 1.38881    | .0409645  | 11.14  | 0.000 | 1.310798 1.471465    |
| structuraldamage3 | 1.623311   | .0664474  | 11.84  | 0.000 | 1.498163 1.758912    |
| repairperson3     | .9618331   | .0427235  | -0.88  | 0.381 | .8816381 1.049323    |
| cleaningperson3   | .6810056   | .0313041  | -8.36  | 0.000 | .6223335 .7452092    |
| sharingfacility3  | 1.166604   | .049334   | 3.64   | 0.000 | 1.073809 1.267417    |
| watersupply3      | 1.196699   | .0501928  | 4.28   | 0.000 | 1.102258 1.299232    |
| emptfreq3         | 1.520031   | .1600559  | 3.98   | 0.000 | 1.236582 1.868453    |
| floodrisk         | 1.03312    | .0224587  | 1.50   | 0.134 | .9900266 1.07809     |
| _cons             | .1612441   | .019568   | -15.04 | 0.000 | .1271116 .2045421    |

**Fig S6. Output results for Model 2c: Outcome = rate of overflows; Sanitation type = septic systems.**

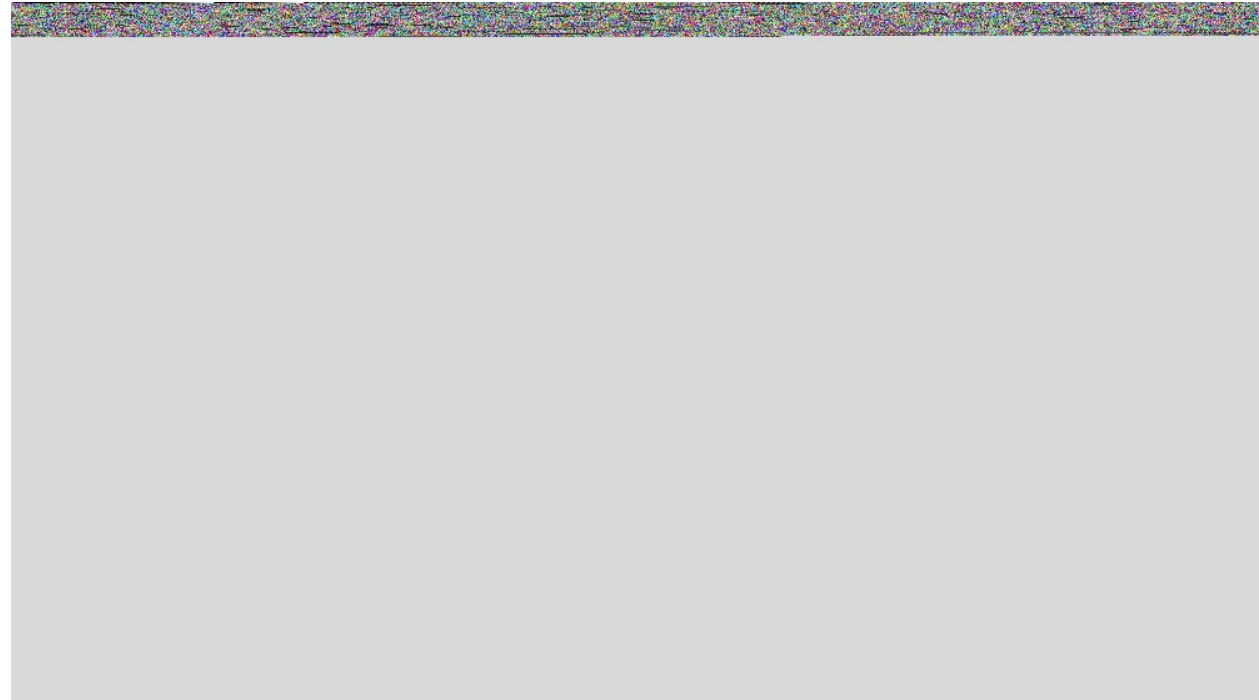

**Table S14. Scoring Rule Results for Model 2c.**

|                  |        |
|------------------|--------|
| Logarithmic loss | 0.4537 |
| Quadratic loss   | 0.2881 |
| Spherical payoff | 0.8417 |
| Gini coeff       | 0.2874 |
| Area under ROC   | 0.6437 |

**Table S15. Logistic regression results for variables included in Model 2c.**

| overflowing3      | Odds ratio | Std. err. | z     | P>z   | [95% conf. interval] |          |
|-------------------|------------|-----------|-------|-------|----------------------|----------|
| visibleexcreta3   | 1.350707   | .2541291  | 1.60  | 0.110 | .9341396             | 1.953038 |
| fliespresent3     | 1.046466   | .2079297  | 0.23  | 0.819 | .7089147             | 1.544744 |
| floorcondition3   | 2.331651   | .3768038  | 5.24  | 0.000 | 1.698659             | 3.200523 |
| structuraldamage3 | .7641346   | .1587888  | -1.29 | 0.195 | .508497              | 1.148289 |
| repairperson3     | .8394267   | .2064261  | -0.71 | 0.477 | .5183954             | 1.359266 |
| cleaningperson3   | 1.312417   | .2633633  | 1.35  | 0.175 | .8856471             | 1.944835 |
| sharingfacility3  | 1.001603   | .1897403  | 0.01  | 0.993 | .6909507             | 1.451926 |
| watersupply3      | 1.014786   | .2481948  | 0.06  | 0.952 | .628332              | 1.638929 |
| emptfreq3         | 1          | (omitted) |       |       |                      |          |
| floodrisk         | 1.730712   | .2401616  | 3.95  | 0.000 | 1.318585             | 2.27165  |
| _cons             | .0407979   | .0155253  | -8.41 | 0.000 | .0193518             | .0860113 |

**Fig S7. Output results for Model 3a: Outcome = combined rate of overflows and leakages; Sanitation type = pit latrines and septic systems.**

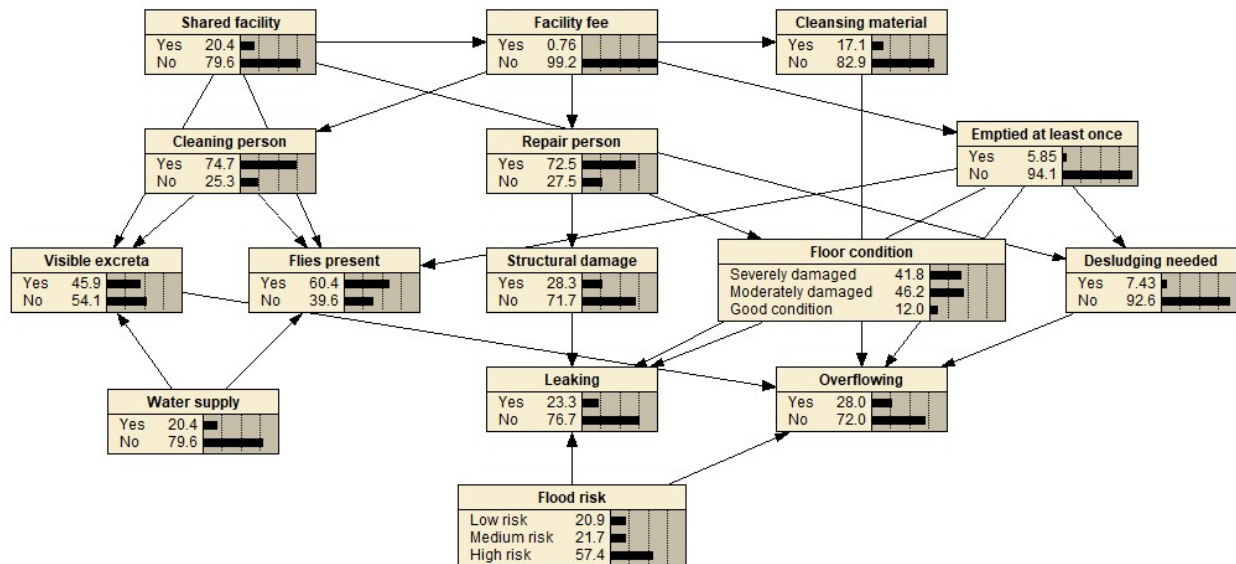

**Table S16. Scoring Rule Results for Model 3a.**

|                             | Overflows | Leakages |
|-----------------------------|-----------|----------|
| <b>Error rate</b>           | 19.94%    | 22.61%   |
| <b>Scoring rule results</b> |           |          |
| Logarithmic loss            | 0.483     | 0.5221   |
| Quadratic loss              | 0.3124    | 0.3406   |
| Spherical payoff            | 0.8277    | 0.8112   |
| <b>Gini coeff</b>           | 0.3077    | 0.1864   |
| Area under ROC              | 0.6539    | 0.5932   |

**Table S17. Logistic regression results for variables included in Model 3a (outcome = overflows).**

| <b>overflowing3</b> | <b>Odds ratio</b> | <b>Std. err.</b> | <b>z</b> | <b>P&gt;z</b> | <b>[95% conf. interval]</b> |
|---------------------|-------------------|------------------|----------|---------------|-----------------------------|
| floodrisk           | 1.085584          | .025765          | 3.46     | 0.001         | 1.036242 1.137275           |
| visibleexcreta3     | 1.110549          | .0422535         | 2.76     | 0.006         | 1.030746 1.19653            |
| fliespresent3       | 1.336559          | .0538252         | 7.20     | 0.000         | 1.23512 1.44633             |
| structuraldamage3   | 1.126676          | .0516701         | 2.60     | 0.009         | 1.029822 1.232638           |
| floorcondition3     | 1.277343          | .0410364         | 7.62     | 0.000         | 1.199393 1.360359           |
| desludgingneeded3   | 1                 | (omitted)        |          |               |                             |
| emptiedonce3        | .4849606          | .0500188         | -7.02    | 0.000         | .3961993 .5936073           |
| cleansematerial3    | 1.057019          | .053023          | 1.11     | 0.269         | .958041 1.166222            |
| repairperson3       | .956218           | .0455583         | -0.94    | 0.347         | .8709676 1.049813           |
| cleaningperson3     | .7715244          | .0382094         | -5.24    | 0.000         | .7001551 .8501686           |
| facilityfee3        | .5503665          | .146493          | -2.24    | 0.025         | .3266515 .927298            |
| sharingfacility3    | 1.173796          | .0536405         | 3.51     | 0.000         | 1.073233 1.283781           |
| watersupply3        | 1.218332          | .0549345         | 4.38     | 0.000         | 1.115283 1.330903           |
| _cons               | .1961189          | .0130092         | -24.56   | 0.000         | .1722092 .2233482           |

**Table S18. Logistic regression results for variables included in Model 3a (outcome = leakage).**

| <b>leaking3</b>   | <b>Odds ratio</b> | <b>Std. err.</b> | <b>z</b> | <b>P&gt;z</b> | <b>[95% conf. interval]</b> |
|-------------------|-------------------|------------------|----------|---------------|-----------------------------|
| floodrisk         | 1.081079          | .0243549         | 3.46     | 0.001         | 1.034382 1.129883           |
| visibleexcreta3   | 1.132832          | .0410617         | 3.44     | 0.001         | 1.055145 1.216239           |
| fliespresent3     | 1.325269          | .0513402         | 7.27     | 0.000         | 1.228369 1.429812           |
| structuraldamage3 | 1.126459          | .049003          | 2.74     | 0.006         | 1.034395 1.226716           |
| floorcondition3   | 1.297117          | .0395106         | 8.54     | 0.000         | 1.221944 1.376915           |
| desludgingneeded3 | 2.208926          | .1372326         | 12.76    | 0.000         | 1.955685 2.494958           |
| emptiedonce3      | .3809119          | .0376363         | -9.77    | 0.000         | .3138492 .4623045           |
| cleaningperson3   | .7572879          | .0307268         | -6.85    | 0.000         | .6993968 .8199707           |
| facilityfee3      | .703359           | .1592601         | -1.55    | 0.120         | .451275 1.096258            |
| sharingfacility3  | 1.157087          | .0504578         | 3.35     | 0.001         | 1.0623 1.260332             |
| watersupply3      | 1.197823          | .0514412         | 4.20     | 0.000         | 1.101127 1.303011           |
| _cons             | .1925941          | .0118267         | -26.82   | 0.000         | .1707549 .2172265           |

**Fig S8. Output results for Model 3b: Outcome = combined rate of overflows and leakages; Sanitation type = pit latrines.**

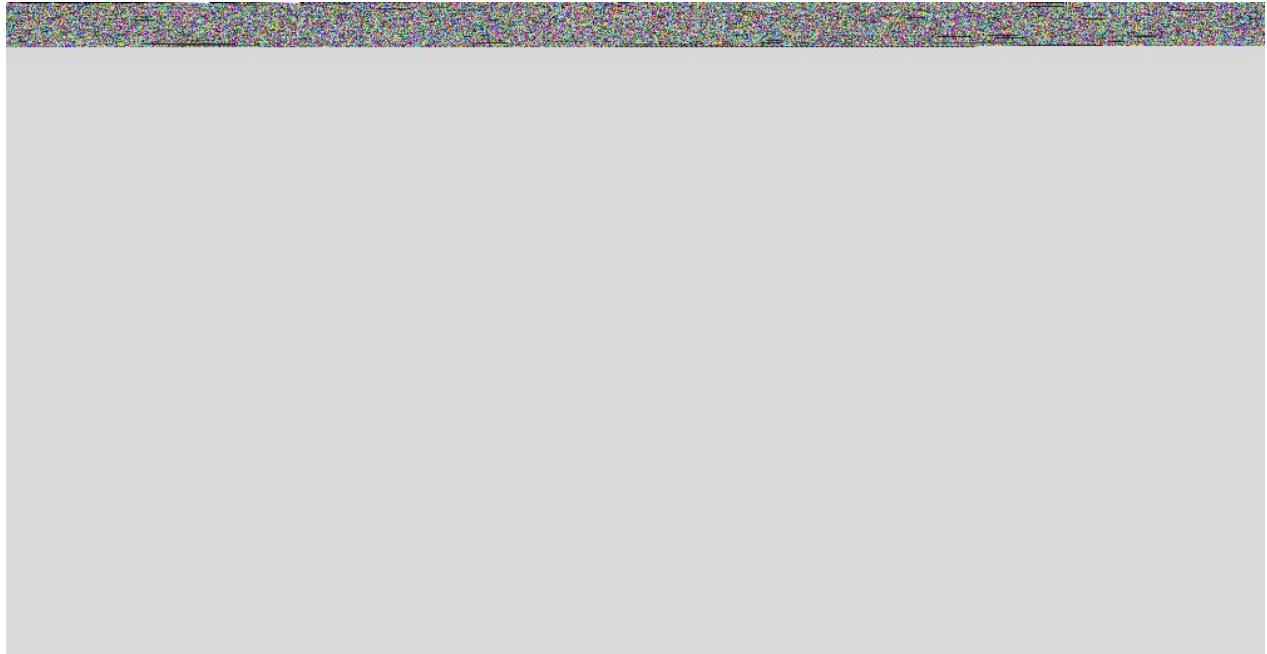

**Table S19. Scoring Rule Results for Model 3b.**

|                             | <b>Overflowing</b> | <b>Leaking</b> |
|-----------------------------|--------------------|----------------|
| <b>Error rate</b>           | 72.3%              | 23.44%         |
| <b>Scoring Rule Results</b> |                    |                |
| Logarithmic loss            | 0.6931             | 0.5315         |
| Quadratic loss              | 0.5                | 0.349          |
| Spherical payoff            | 0.7071             | 0.806          |
| <b>Gini coeff</b>           | 0                  | 0.2059         |
| Area under ROC              | 0.5                | 0.603          |

**Table S20. Logistic regression results for variables included in Model 3b (outcome = overflows).**

| <b>overflowing3</b> | <b>Odds ratio</b> | <b>Std. err.</b> | <b>z</b> | <b>P&gt;z</b> | <b>[95% conf. interval]</b> |
|---------------------|-------------------|------------------|----------|---------------|-----------------------------|
| floodrisk           | 1.081389          | .026102          | 3.24     | 0.001         | 1.031422 1.133778           |
| visibleexcreta3     | 1.144008          | .0445614         | 3.45     | 0.001         | 1.05992 1.234767            |
| fliespresent3       | 1.346963          | .055264          | 7.26     | 0.000         | 1.242888 1.459752           |
| structuraldamage3   | 1.173166          | .0548552         | 3.42     | 0.001         | 1.070431 1.28576            |
| floorcondition3     | 1.229172          | .0401989         | 6.31     | 0.000         | 1.152856 1.310541           |
| desludgingneeded3   | 1                 | (omitted)        |          |               |                             |
| emptiedonce3        | .4647968          | .048011          | -7.42    | 0.000         | .3796109 .5690986           |
| cleansematerial3    | 1.008558          | .0530764         | 0.16     | 0.871         | .9097154 1.11814            |
| repairperson3       | 1.000504          | .0488943         | 0.01     | 0.992         | .9091192 1.101075           |
| cleaningperson3     | .7319553          | .0374279         | -6.10    | 0.000         | .6621541 .8091146           |
| facilityfee3        | .5669939          | .1516089         | -2.12    | 0.034         | .3357183 .9575948           |
| sharingfacility3    | 1.200696          | .0562555         | 3.90     | 0.000         | 1.095349 1.316176           |
| watersupply3        | 1.199823          | .055177          | 3.96     | 0.000         | 1.096409 1.312991           |
| _cons               | .2074241          | .0139769         | -23.34   | 0.000         | .1817617 .2367096           |

**Table S21. Logistic regression results for variables included in Model 3b (outcome = leakages).**

| <b>leaking3</b>   | <b>Odds ratio</b> | <b>Std. err.</b> | <b>z</b> | <b>P&gt;z</b> | <b>[95% conf. interval]</b> |
|-------------------|-------------------|------------------|----------|---------------|-----------------------------|
| floodrisk         | 1.076717          | .0247537         | 3.22     | 0.001         | 1.029277 1.126343           |
| visibleexcreta3   | 1.163909          | .0431894         | 4.09     | 0.000         | 1.082265 1.251713           |
| fliespresent3     | 1.341328          | .0529945         | 7.43     | 0.000         | 1.24138 1.449323            |
| structuraldamage3 | 1.171125          | .0519829         | 3.56     | 0.000         | 1.073547 1.277573           |
| floorcondition3   | 1.254914          | .0390172         | 7.30     | 0.000         | 1.180725 1.333765           |
| desludgingneeded3 | 2.132668          | .1355589         | 11.92    | 0.000         | 1.882861 2.415618           |
| emptiedonce3      | .3684645          | .0364705         | -10.09   | 0.000         | .3034898 .4473498           |
| cleansematerial3  | 1.00197           | .0511586         | 0.04     | 0.969         | .9065549 1.107428           |
| repairperson3     | .9634287          | .0447522         | -0.80    | 0.423         | .8795903 1.055258           |
| cleaningperson3   | .7476562          | .0362655         | -6.00    | 0.000         | .6798512 .8222238           |
| facilityfee3      | .7044116          | .1636016         | -1.51    | 0.131         | .4468198 1.110505           |
| sharingfacility3  | 1.176435          | .0527475         | 3.62     | 0.000         | 1.077464 1.284497           |
| watersupply3      | 1.180124          | .0516645         | 3.78     | 0.000         | 1.083087 1.285856           |
| _cons             | .2072787          | .0133481         | -24.44   | 0.000         | .1827006 .2351631           |

**Fig S9. Output results for Model 3c: Outcome = combined rate of overflows and leakages; Sanitation type = septic systems.**

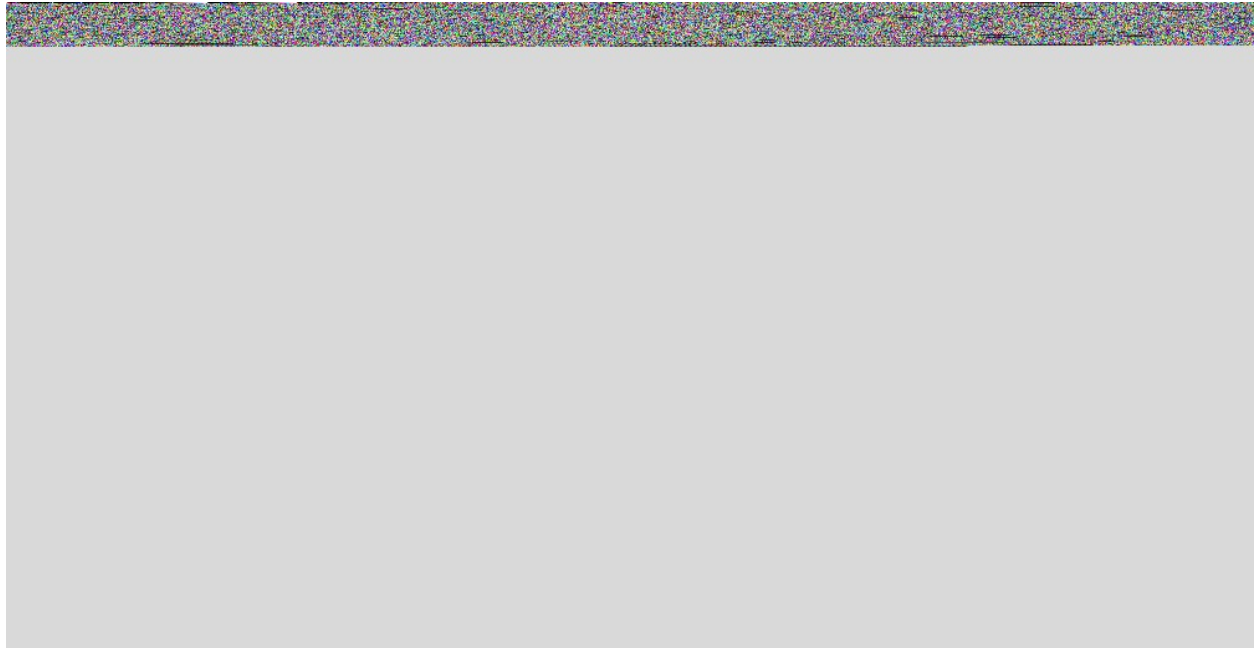

**Table S22. Scoring Rule Results for Model 3c.**

|                             | <b>Overflowing</b> | <b>Leaking</b> |
|-----------------------------|--------------------|----------------|
| <b>Error rate</b>           | 81.13              | 14.82          |
| <b>Scoring Rule Results</b> |                    |                |
| Logarithmic loss            | 0.6931             | 0.3838         |
| Quadratic loss              | 0.5                | 0.2349         |
| Spherical payoff            | 0.7071             | 0.872          |
| <b>Gini coeff</b>           | 0                  | 0.4094         |
| Area under ROC              | 0.5                | 0.7047         |



**Table S23. Logistic regression results for variables included in Model 3c (outcome = overflows).**

| <b>overflowing3</b> | <b>Odds ratio</b> | <b>Std. err.</b> | <b>z</b> | <b>P&gt;z</b> | <b>[95% conf. interval]</b> |
|---------------------|-------------------|------------------|----------|---------------|-----------------------------|
| floodrisk           | 2.253313          | .420254          | 4.36     | 0.000         | 1.563393 3.247692           |
| visibleexcreta3     | 1.226525          | .2594316         | 0.97     | 0.334         | .810275 1.856609            |
| fliespresent3       | 1.193657          | .2722062         | 0.78     | 0.438         | .7634282 1.86634            |
| structuraldamage3   | .3136585          | .0919235         | -3.96    | 0.000         | .1766024 .5570801           |
| floorcondition3     | 2.192711          | .4055738         | 4.24     | 0.000         | 1.525947 3.150819           |
| desludgingneeded3   | 1                 | (omitted)        |          |               |                             |
| emptiedonce3        | 1                 | (omitted)        |          |               |                             |
| cleaningperson3     | 1.574651          | .3637389         | 1.97     | 0.049         | 1.00129 2.476332            |
| facilityfee3        | 1                 | (omitted)        |          |               |                             |
| sharingfacility3    | .8172662          | .1885244         | -0.87    | 0.382         | .5200093 1.284446           |
| watersupply3        | 1.145086          | .3072353         | 0.50     | 0.614         | .6767907 1.937412           |
| _cons               | .0167654          | .0076903         | -8.91    | 0.000         | .0068229 .0411964           |

**Table S24. Logistic regression results for variables included in Model 3c (outcome = leakages).**

| <b>leaking3</b>   | <b>Odds ratio</b> | <b>Std. err.</b> | <b>z</b> | <b>P&gt;z</b> | <b>[95% conf. interval]</b> |
|-------------------|-------------------|------------------|----------|---------------|-----------------------------|
| floodrisk         | 2.059731          | .3452181         | 4.31     | 0.000         | 1.483017 2.860716           |
| visibleexcreta3   | 1.268503          | .2592575         | 1.16     | 0.245         | .8498112 1.89348            |
| fliespresent3     | 1.036811          | .2231064         | 0.17     | 0.867         | .680039 1.580759            |
| structuraldamage3 | .3533482          | .0938181         | -3.92    | 0.000         | .2099901 .5945752           |
| floorcondition3   | 2.123009          | .3693778         | 4.33     | 0.000         | 1.509569 2.98573            |
| desludgingneeded3 | 5.057234          | 1.65032          | 4.97     | 0.000         | 2.667729 9.587039           |
| emptiedonce3      | 1                 | (omitted)        |          |               |                             |
| cleaningperson3   | 1.547284          | .3361394         | 2.01     | 0.045         | 1.010767 2.368586           |
| facilityfee3      | .8283498          | .9617094         | -0.16    | 0.871         | .0851086 8.062207           |
| sharingfacility3  | .8966685          | .1912449         | -0.51    | 0.609         | .5903159 1.362007           |
| watersupply3      | 1.026012          | .2707138         | 0.10     | 0.922         | .6117342 1.720848           |
| _cons             | .0214733          | .0089723         | -9.19    | 0.000         | .0094675 .0487035           |

**Fig S10. Output results for Model 4a: Outcome = leakages; Sanitation type = pit latrines and septic systems.**

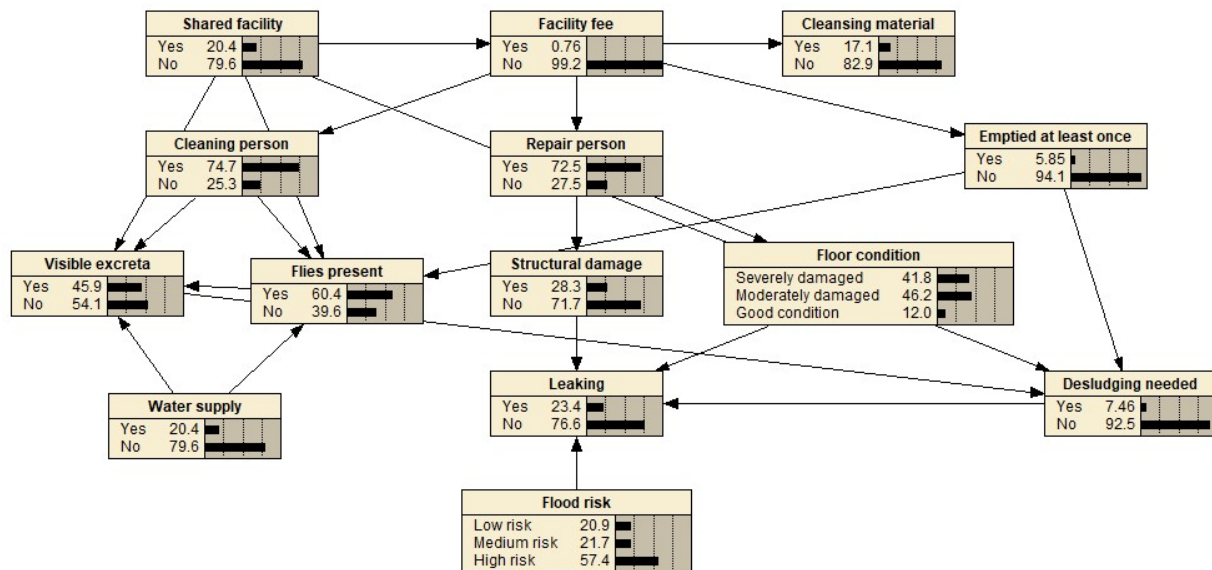

**Table S25. Scoring Rule Results for Model 4a.**

|                             | leaking |
|-----------------------------|---------|
| <b>Error rate</b>           | 22.31   |
| <b>Scoring Rule Results</b> |         |
| Logarithmic loss            | 0.5225  |
| Quadratic loss              | 0.3405  |
| Spherical payoff            | 0.8114  |
| <b>Gini coeff</b>           | 0.1722  |
| Area under ROC              | 0.5861  |

**Table S26. Logistic regression results for variables included in Model 4a.**

| leaking3          | Odds ratio | Std. err. | z      | P>z   | [95% conf. | interv   |
|-------------------|------------|-----------|--------|-------|------------|----------|
| floodrisk         | 1.079952   | .0244001  | 3.40   | 0.001 | 1.033172   | 1.12885  |
| visibleexcreta3   | 1.132935   | .0410705  | 3.44   | 0.001 | 1.055232   | 1.216361 |
| fliespresent3     | 1.327276   | .0514424  | 7.31   | 0.000 | 1.230185   | 1.432029 |
| structuraldamage3 | 1.126583   | .0490427  | 2.74   | 0.006 | 1.034448   | 1.226925 |
| floorcondition3   | 1.298691   | .0396552  | 8.56   | 0.000 | 1.223248   | 1.378787 |
| desludgingneeded3 | 2.204092   | .1370288  | 12.71  | 0.000 | 1.951239   | 2.489712 |
| emptiedonce3      | .3823478   | .0377993  | -9.73  | 0.000 | .314998    | .4640976 |
| repairperson3     | .9276641   | .042006   | -1.66  | 0.097 | .8488816   | 1.013758 |
| cleaningperson3   | .7840607   | .0368521  | -5.18  | 0.000 | .715059    | .859721  |
| sharingfacility3  | 1.152709   | .0503611  | 3.25   | 0.001 | 1.058111   | 1.255764 |
| facilityfee3      | .6971687   | .1584768  | -1.59  | 0.113 | .4465263   | 1.0885   |
| cleansmaterial3   | 1.048379   | .0510081  | 0.97   | 0.332 | .9530233   | 1.153274 |
| watersupply3      | 1.194647   | .0513419  | 4.14   | 0.000 | 1.098141   | .299635  |
| _cons             | .1967324   | .0124653  | -25.66 | 0.000 | .173757    | .2227456 |

**Fig S11. Output results for Model 4b: Outcome = leakages; Sanitation type = pit latrines.**

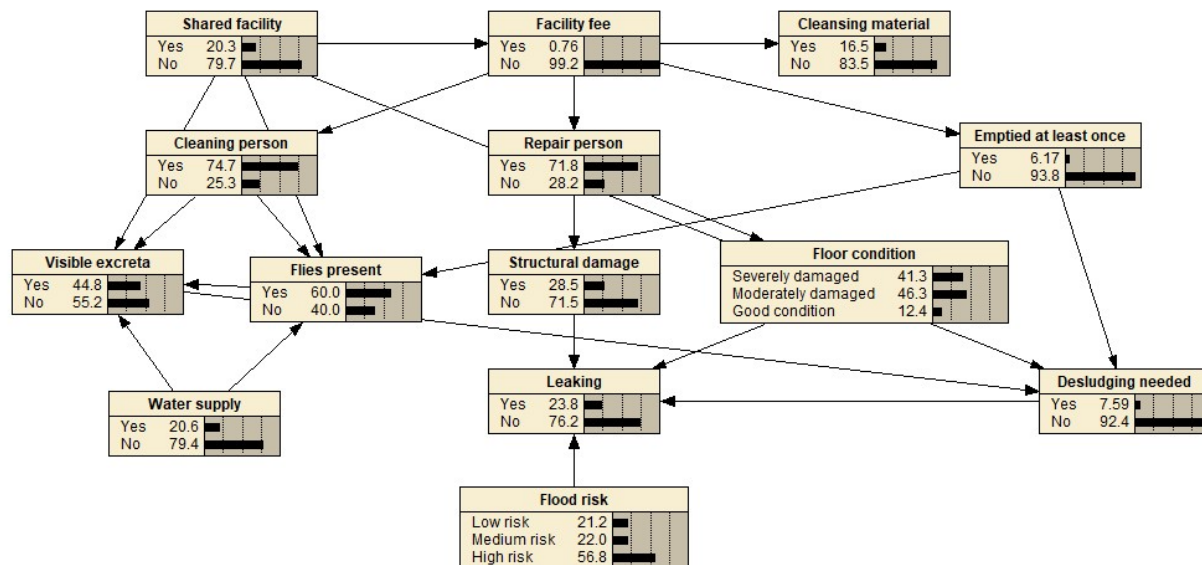

**Table S27. Scoring Rule Results for Model 4b.**

|                             | leaking                                    |
|-----------------------------|--------------------------------------------|
| <b>Error rate</b>           | 23.02%                                     |
| <b>Scoring Rule Results</b> |                                            |
| Logarithmic loss            | 0.5324                                     |
| Quadratic loss              | 0.3491                                     |
| Spherical payoff            | 0.8061                                     |
| <b>Gini coeff</b>           | 0.164                                      |
| Area under ROC              | 0.582 (ROC curve dips below main diagonal) |

**Table S28. Logistic regression results for variables included in Model 4b.**

| leaking3          | Odds ratio | Std. err. | z      | P>z   | [95% conf. interval] |
|-------------------|------------|-----------|--------|-------|----------------------|
| floodrisk         | 1.076717   | .0247537  | 3.22   | 0.001 | 1.029277 1.126343    |
| visibleexcreta3   | 1.163909   | .0431894  | 4.09   | 0.000 | 1.082265 1.251713    |
| fliespresent3     | 1.341328   | .0529945  | 7.43   | 0.000 | 1.24138 1.449323     |
| structuraldamage3 | 1.171125   | .0519829  | 3.56   | 0.000 | 1.073547 1.277573    |
| floorcondition3   | 1.254914   | .0390172  | 7.30   | 0.000 | 1.180725 1.333765    |
| desludgingneeded3 | 2.132668   | .1355589  | 11.92  | 0.000 | 1.882861 2.415618    |
| emptiedonce3      | .3684645   | .0364705  | -10.09 | 0.000 | .3034898 .4473498    |
| repairperson3     | .9634287   | .0447522  | -0.80  | 0.423 | .8795903 1.055258    |
| cleaningperson3   | .7476562   | .0362655  | -6.00  | 0.000 | .6798512 .8222238    |
| sharingfacility3  | 1.176435   | .0527475  | 3.62   | 0.000 | 1.077464 1.284497    |
| facilityfee3      | .7044116   | .1636016  | -1.51  | 0.131 | .4468198 1.110505    |
| cleansmaterial3   | 1.00197    | .0511586  | 0.04   | 0.969 | .9065549 1.107428    |
| watersupply3      | 1.180124   | .0516645  | 3.78   | 0.000 | 1.083087 1.285856    |
| _cons             | .2072787   | .0133481  | -24.44 | 0.000 | .1827006 .2351631    |

**Fig S12. Output results for Model 4c: Outcome = leakages; Sanitation type = septic systems**

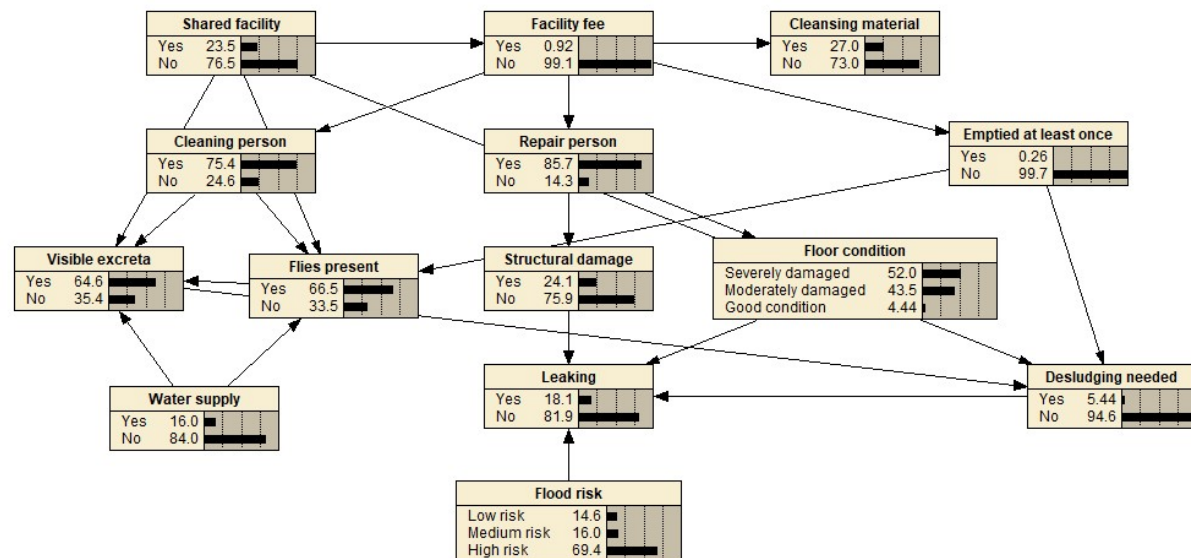

**Table S29. Scoring Rule Results for Model 4c.**

|                             | leaking |
|-----------------------------|---------|
| <b>Error rate</b>           | 16.17   |
| <b>Scoring Rule Results</b> |         |
| Logarithmic loss            | 0.3924  |
| Quadratic loss              | 0.244   |
| Spherical payoff            | 0.866   |
| <b>Gini coeff</b>           | 0.433   |
| Area under ROC              | 0.7165  |

**Table S30. Logistic regression results for variables included in Model 4c.**

| leaking3          | Odds ratio | Std. err. | z     | P>z   | [95% conf. interval] |
|-------------------|------------|-----------|-------|-------|----------------------|
| floodrisk         | 1.98439    | .3373869  | 4.03  | 0.000 | 1.422018 2.769164    |
| visibleexcreta3   | 1.45764    | .3098413  | 1.77  | 0.076 | .9609835 2.21098     |
| fliespresent3     | 1.141448   | .2546722  | 0.59  | 0.553 | .7371256 1.767545    |
| structuraldamage3 | .3539402   | .0953432  | -3.86 | 0.000 | .2087546 .6001002    |
| floorcondition3   | 2.154448   | .3865374  | 4.28  | 0.000 | 1.515719 3.062339    |
| desludgingneeded3 | 5.573121   | 1.864726  | 5.13  | 0.000 | 2.892628 10.73753    |
| emptiedonce3      | 1          | (omitted) |       |       |                      |
| repairperson3     | 1.461152   | .4313811  | 1.28  | 0.199 | .8192045 2.606146    |
| cleaningperson3   | 1.20162    | .2817002  | 0.78  | 0.433 | .7589568 1.902469    |
| sharingfacility3  | .8826395   | .1925656  | -0.57 | 0.567 | .5755414 1.353599    |
| facilityfee3      | .640687    | .7748764  | -0.37 | 0.713 | .0598637 6.856908    |
| cleansmaterial3   | 2.892491   | .556772   | 5.52  | 0.000 | 1.983468 4.218118    |
| watersupply3      | 1.09578    | .2954404  | 0.34  | 0.734 | .6459895 1.858752    |
| _cons             | .0113863   | .0054907  | -9.28 | 0.000 | .0044251 .029298     |

**Fig S13. Sample design for the household survey**

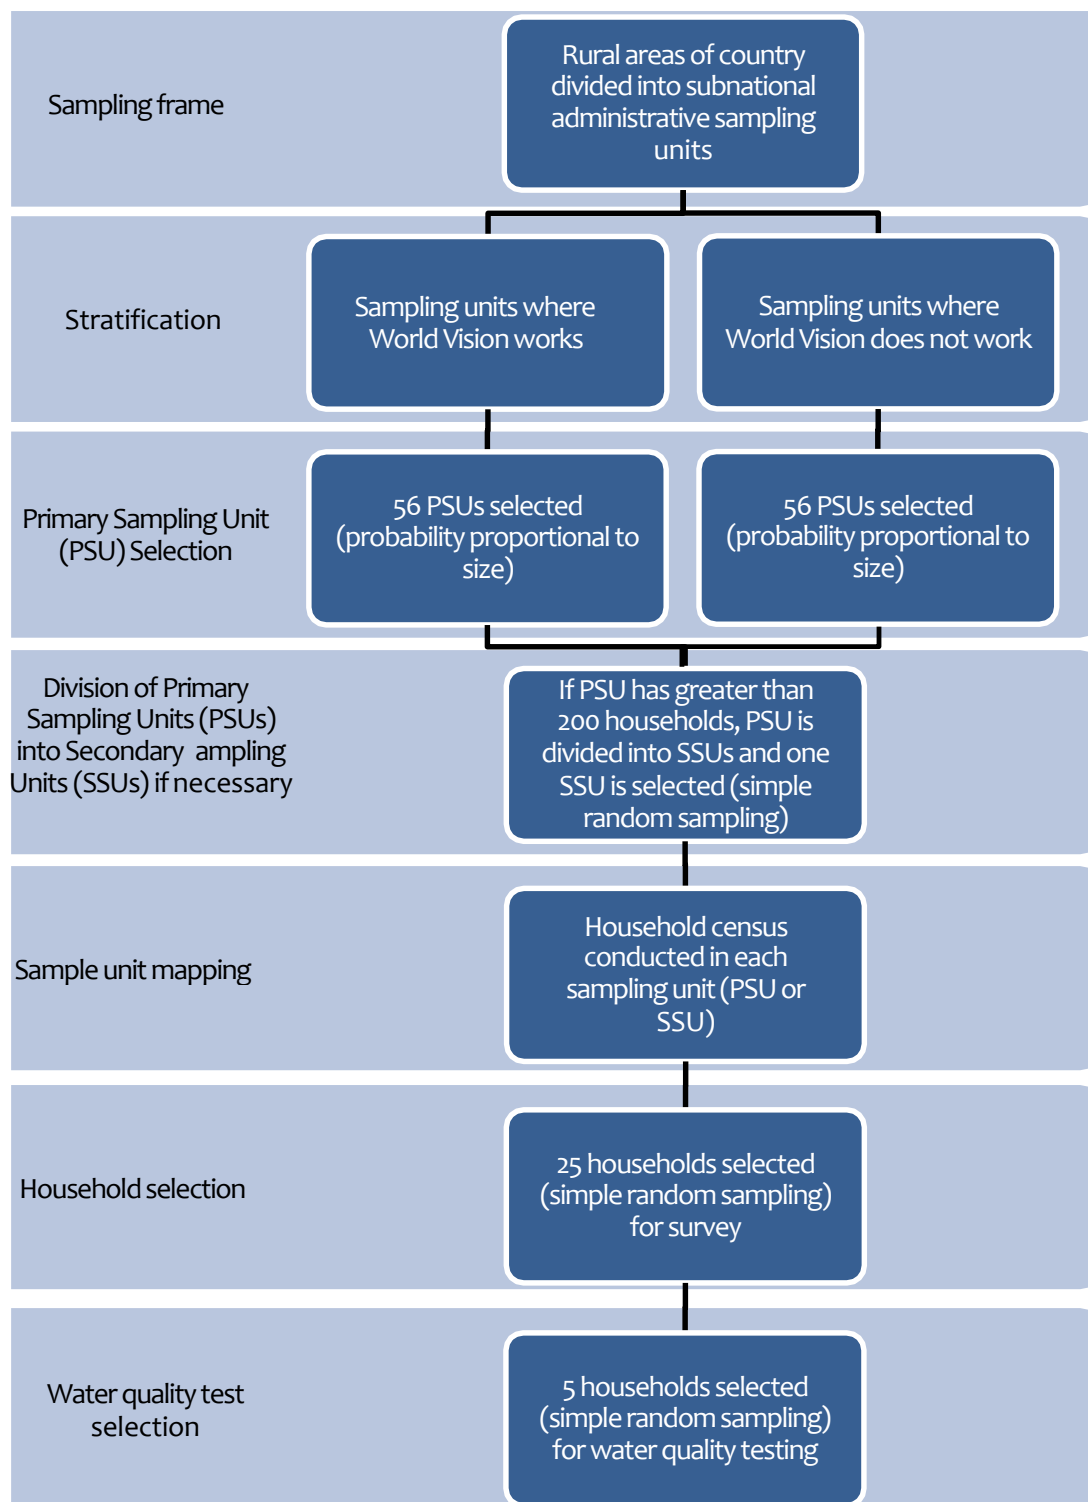

Supplement: d5ew00920k1.pdf [file d5ew00920k1.pdf]
